# Supplementary material
Source: Elsevier journal article supplement (https://comptes-rendus.academie-sciences.fr/chimie/article/10.1016/j.crci.2007.11.013/file/attach/mmc1.pdf)
Supplement: mmc1 [file mmc1.pdf]

Supplementary material.

**Effect of the nuclearity of perhydrocarbyl Fe(II)  
complexes on the grafting on oxide supports.**

**Effet de la nucléarité de complexes  
perhydrocarbyl de Fer (II) sur le greffage sur  
supports oxydes.**

Charbel Roukoss, Jean-Marie Basset, Christophe Copéret,<sup>\*</sup> Christine

Lucas, Emile Kuntz.

*Université de Lyon, Institut de Chimie de Lyon, C2P2 CNRS, LCOMS -  
ESCPE Lyon, 43 bd du 11 Novembre 1918, F-69616 Villeurbanne Cedex,*

*France.*

Tél: 33 (0)4 72431811 ; fax : 33 (0)4 72431795 ; e-mail : coperet@cpe.fr

A)

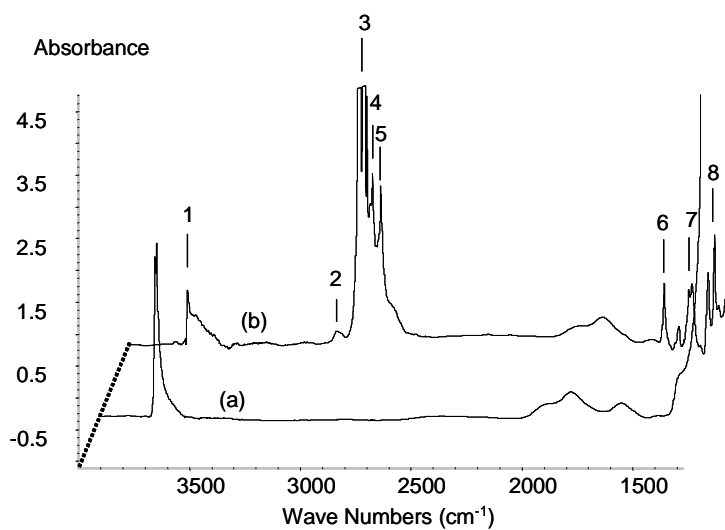

B)

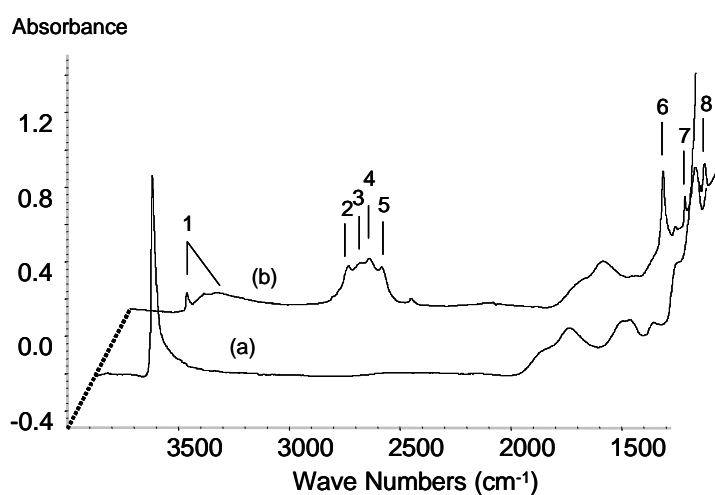

**Figure S1.** Monitoring by IR spectroscopy of the grafting of **1** (A) and **2** (B) on a silica-alumina partially dehydroxylated at 500 °C, SiO<sub>2</sub>-Al<sub>2</sub>O<sub>3-(500)</sub> : (a) SiO<sub>2</sub>-Al<sub>2</sub>O<sub>3-(500)</sub> pellet (50 mg) (b) after impregnation of **1** or **2**, followed by three washings (30 min at 25 °C, in pentane for **1** and in toluene for **2**) and a drying step under vacuum ( $1.32 \cdot 10^{-3}$  Pa, 1 h, 25 °C).

A)

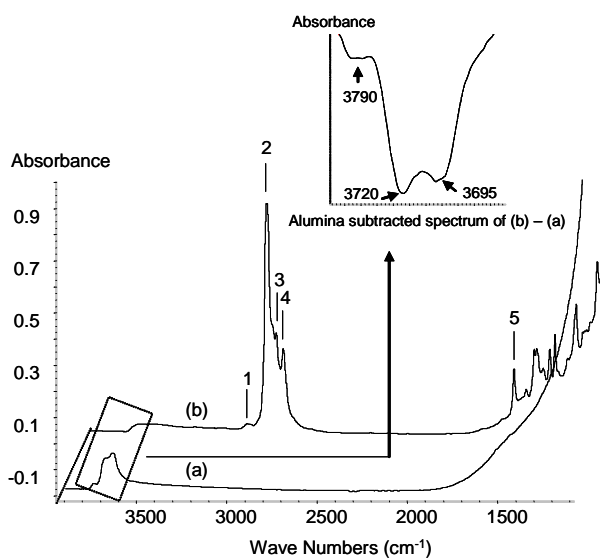

B)

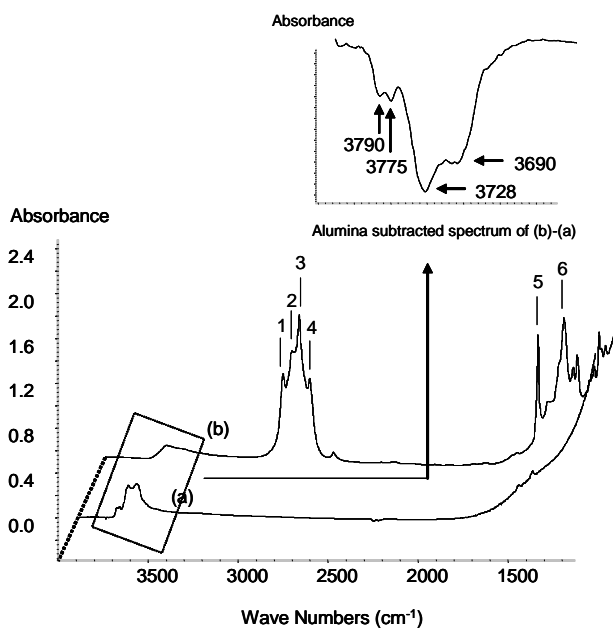

**Figure S2.** Monitoring by IR spectroscopy of the grafting on an alumina partially dehydroxylated at 500 °C, Al<sub>2</sub>O<sub>3-(500)</sub> for **1** (A) and **2** (B): (a) Al<sub>2</sub>O<sub>3-(500)</sub> pellet (50 mg) (b) after impregnation of **1** or **2** (20 mg), followed by three washings (30 min at 25 °C, in pentane for **1** and in toluene for **2**) and a drying step under vacuum ( $1.32 \cdot 10^{-3}$  Pa, 1 h, 25 °C).
